# Supplementary material for: Natural diversity of the honey bee (Apis mellifera) gut bacteriome in various climatic and seasonal states
Source: PubMed Central journal article supplement (PMC9462563; doi:10.1371/journal.pone.0273844), 2022-09-09

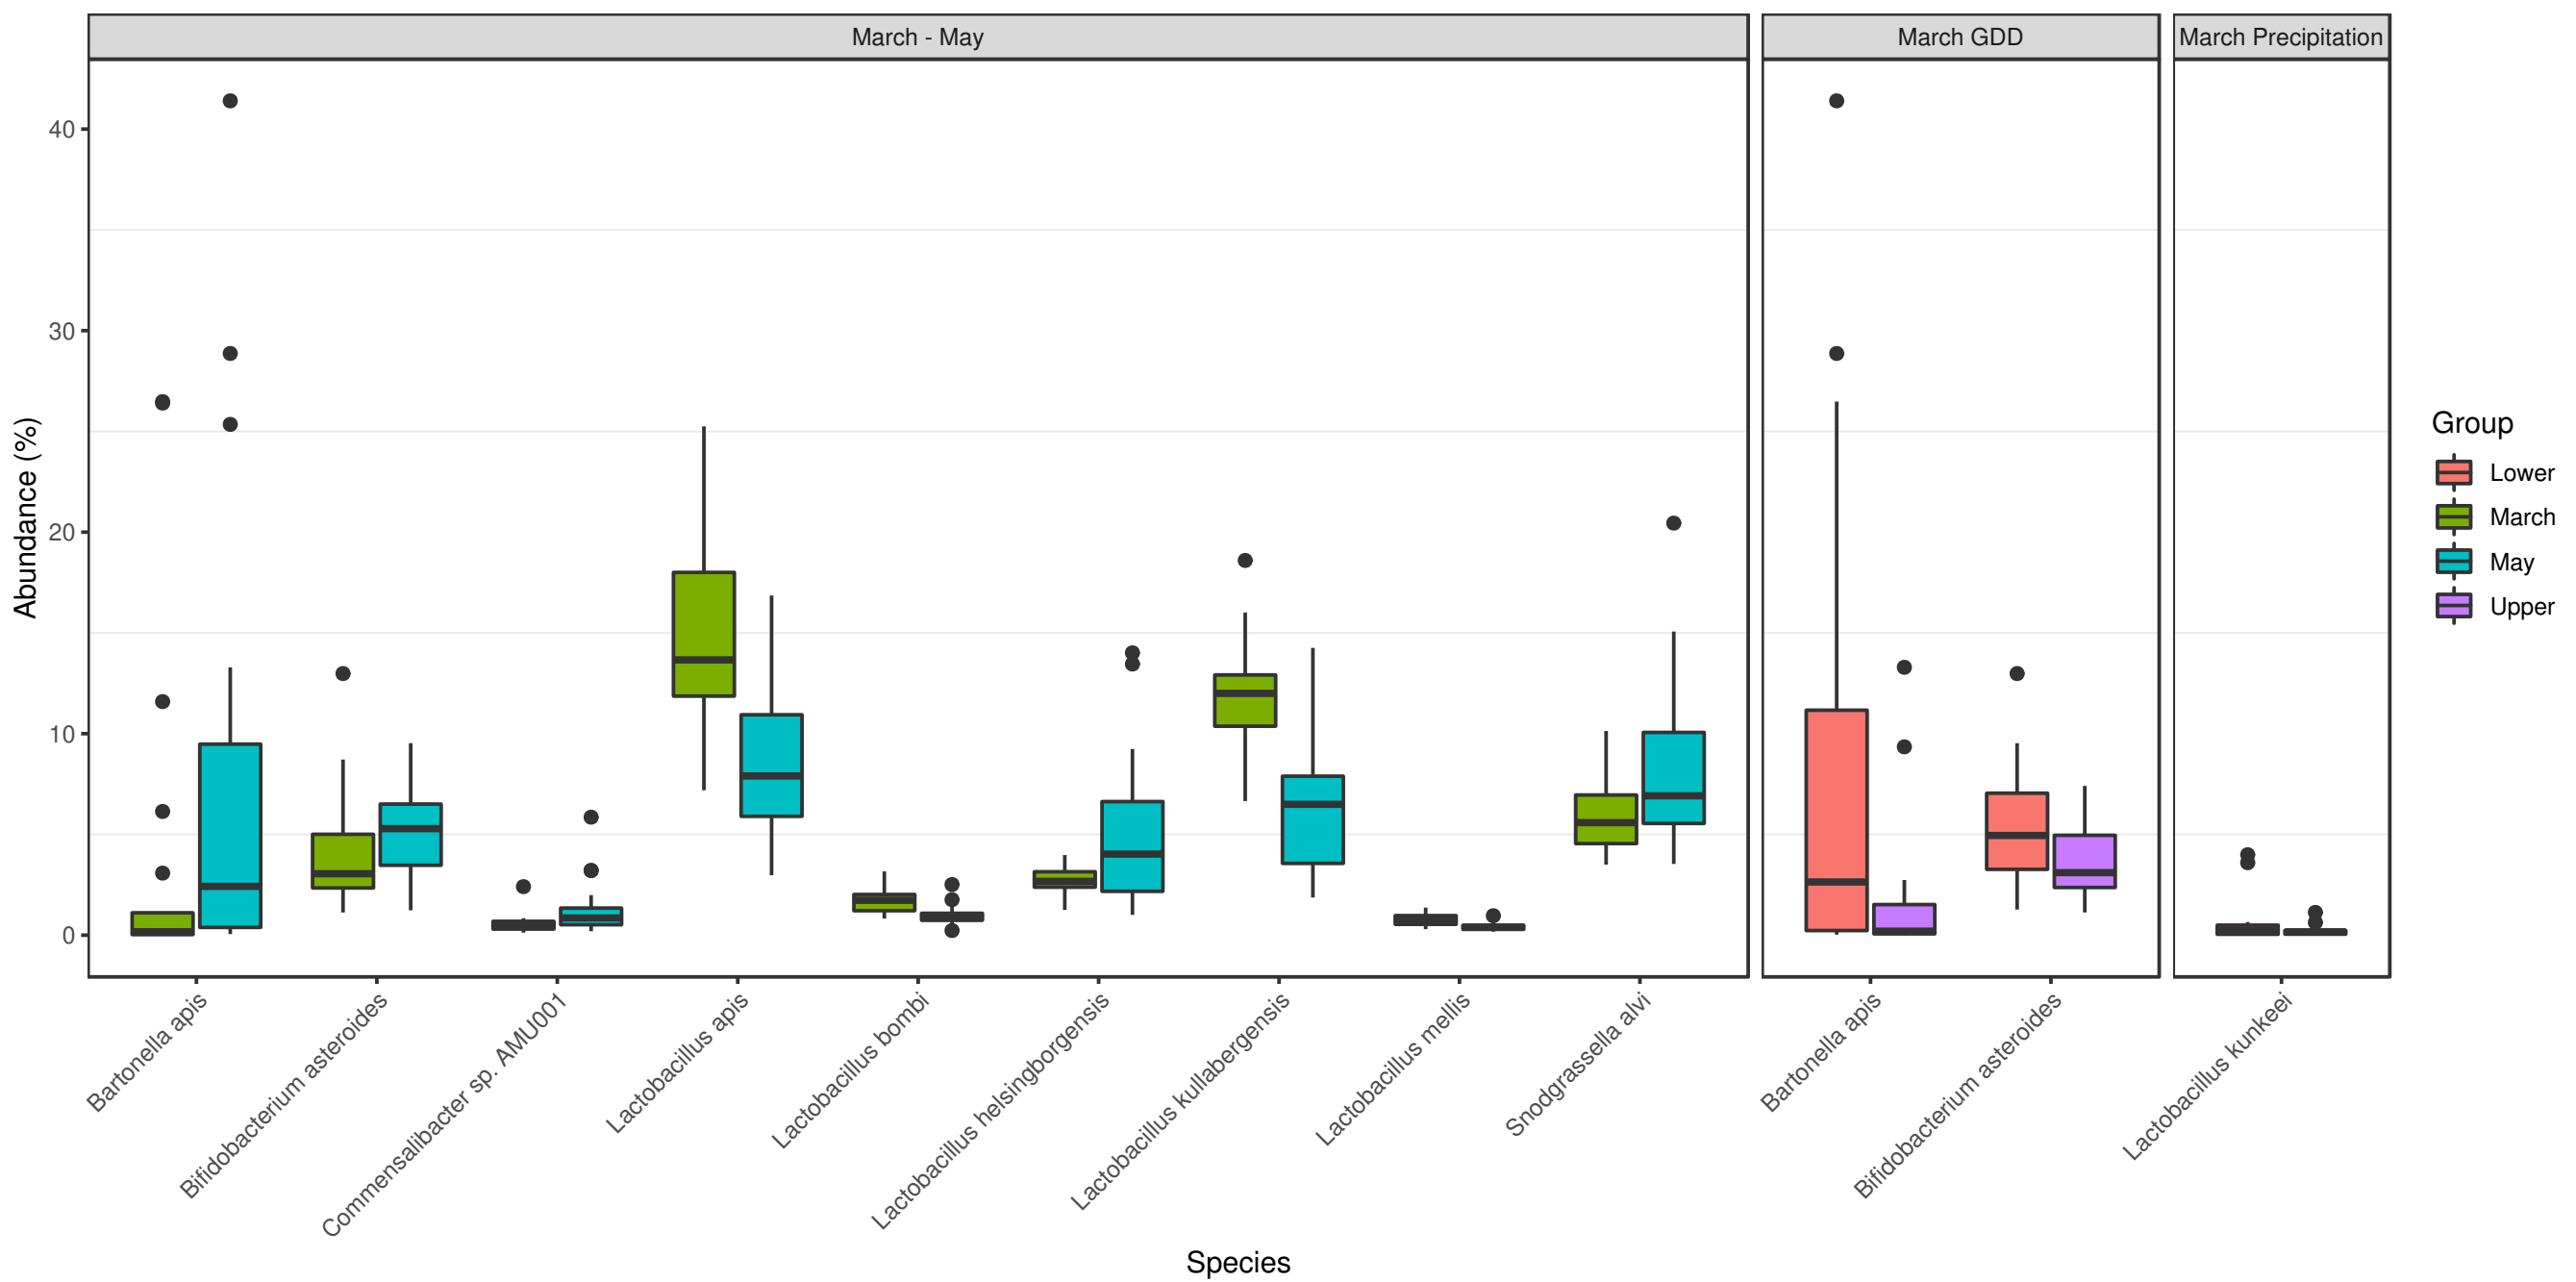

Supplement: pone.0273844.s001.pdf [file pone.0273844.s001.pdf]
