# Supplementary material for: Natural diversity of the honey bee (Apis mellifera) gut bacteriome in various climatic and seasonal states
Source: PubMed Central journal article supplement (PMC9462563; doi:10.1371/journal.pone.0273844), 2022-09-09
Supplement: pone.0273844.s002.pdf [file pone.0273844.s002.pdf]

Table S1

| Apiary ID | Family ID | March                       |                                     |                                      | May                         |                                     |                                      |
|-----------|-----------|-----------------------------|-------------------------------------|--------------------------------------|-----------------------------|-------------------------------------|--------------------------------------|
|           |           | Number of workers collected | Number of removed intestinal tracts | Number of pooled guts for sequencing | Number of workers collected | Number of removed intestinal tracts | Number of pooled guts for sequencing |
| 1         | a         | 20                          | 10                                  | 30                                   | 20                          | 10                                  | 30                                   |
| 1         | b         | 20                          | 10                                  |                                      | 20                          | 10                                  |                                      |
| 1         | c         | 20                          | 10                                  |                                      | 20                          | 10                                  |                                      |
| 2         | a         | 20                          | 10                                  | 30                                   | 20                          | 10                                  | 30                                   |
| 2         | b         | 20                          | 10                                  |                                      | 20                          | 10                                  |                                      |
| 2         | c         | 20                          | 10                                  |                                      | 20                          | 10                                  |                                      |
| 3         | a         | 20                          | 10                                  | 30                                   | 20                          | 10                                  | 30                                   |
| 3         | b         | 20                          | 10                                  |                                      | 20                          | 10                                  |                                      |
| 3         | c         | 20                          | 10                                  |                                      | 20                          | 10                                  |                                      |
| 4         | a         | 20                          | 10                                  | 30                                   | 20                          | 10                                  | 30                                   |
| 4         | b         | 20                          | 10                                  |                                      | 20                          | 10                                  |                                      |
| 4         | c         | 20                          | 10                                  |                                      | 20                          | 10                                  |                                      |
| 5         | a         | 20                          | 10                                  | 30                                   | 20                          | 10                                  | 30                                   |
| 5         | b         | 20                          | 10                                  |                                      | 20                          | 10                                  |                                      |
| 5         | c         | 20                          | 10                                  |                                      | 20                          | 10                                  |                                      |
| 6         | a         | 20                          | 10                                  | 30                                   | 20                          | 10                                  | 20                                   |
| 6         | b         | 20                          | 10                                  |                                      | 20                          | 10                                  |                                      |
| 6         | c         | 20                          | 10                                  |                                      | 0                           | 0                                   |                                      |
| 7         | a         | 20                          | 10                                  | 30                                   | 20                          | 10                                  | 30                                   |
| 7         | b         | 20                          | 10                                  |                                      | 20                          | 10                                  |                                      |
| 7         | c         | 20                          | 10                                  |                                      | 20                          | 10                                  |                                      |
| 8         | a         | 20                          | 10                                  | 30                                   | 20                          | 10                                  | 30                                   |
| 8         | b         | 20                          | 10                                  |                                      | 20                          | 10                                  |                                      |
| 8         | c         | 20                          | 10                                  |                                      | 20                          | 10                                  |                                      |
| 9         | a         | 20                          | 10                                  | 30                                   | 20                          | 10                                  | 30                                   |
| 9         | b         | 20                          | 10                                  |                                      | 20                          | 10                                  |                                      |
| 9         | c         | 20                          | 10                                  |                                      | 20                          | 10                                  |                                      |
| 10        | a         | 20                          | 10                                  | 30                                   | 20                          | 10                                  | 30                                   |
| 10        | b         | 20                          | 10                                  |                                      | 20                          | 10                                  |                                      |
| 10        | c         | 20                          | 10                                  |                                      | 20                          | 10                                  |                                      |
| 11        | a         | 20                          | 10                                  | 30                                   | 20                          | 10                                  | 30                                   |
| 11        | b         | 20                          | 10                                  |                                      | 20                          | 10                                  |                                      |
| 11        | c         | 20                          | 10                                  |                                      | 20                          | 10                                  |                                      |
| 12        | a         | 20                          | 10                                  | 30                                   | 20                          | 10                                  | 30                                   |
| 12        | b         | 20                          | 10                                  |                                      | 20                          | 10                                  |                                      |
| 12        | c         | 20                          | 10                                  |                                      | 20                          | 10                                  |                                      |
| 13        | a         | 20                          | 10                                  | 30                                   | 20                          | 10                                  | 20                                   |
| 13        | b         | 20                          | 10                                  |                                      | 20                          | 10                                  |                                      |
| 13        | c         | 20                          | 10                                  |                                      | 0                           | 0                                   |                                      |
| 14        | a         | 20                          | 10                                  | 30                                   | 20                          | 10                                  | 30                                   |
| 14        | b         | 20                          | 10                                  |                                      | 20                          | 10                                  |                                      |
| 14        | c         | 20                          | 10                                  |                                      | 20                          | 10                                  |                                      |
| 15        | a         | 20                          | 10                                  | 30                                   | 20                          | 10                                  | 30                                   |
| 15        | b         | 20                          | 10                                  |                                      | 20                          | 10                                  |                                      |
| 15        | c         | 20                          | 10                                  |                                      | 20                          | 10                                  |                                      |
| 16        | a         | 20                          | 10                                  | 30                                   | 20                          | 10                                  | 30                                   |
| 16        | b         | 20                          | 10                                  |                                      | 20                          | 10                                  |                                      |
| 16        | c         | 20                          | 10                                  |                                      | 20                          | 10                                  |                                      |
| 17        | a         | 20                          | 10                                  | 30                                   | 20                          | 10                                  | 30                                   |
| 17        | b         | 20                          | 10                                  |                                      | 20                          | 10                                  |                                      |
| 17        | c         | 20                          | 10                                  |                                      | 20                          | 10                                  |                                      |
| 18        | a         | 20                          | 10                                  | 30                                   | 20                          | 10                                  | 30                                   |
| 18        | b         | 20                          | 10                                  |                                      | 20                          | 10                                  |                                      |
| 18        | c         | 20                          | 10                                  |                                      | 20                          | 10                                  |                                      |
| 19        | a         | 20                          | 10                                  | 30                                   | 20                          | 10                                  | 30                                   |
| 19        | b         | 20                          | 10                                  |                                      | 20                          | 10                                  |                                      |
| 19        | c         | 20                          | 10                                  |                                      | 20                          | 10                                  |                                      |
| 20        | a         | 20                          | 10                                  | 30                                   | 20                          | 10                                  | 30                                   |
| 20        | b         | 20                          | 10                                  |                                      | 20                          | 10                                  |                                      |
| 20        | c         | 20                          | 10                                  |                                      | 20                          | 10                                  |                                      |
